# Supplementary material for: Polyphenolic condensation assembly enabled biocompatible, antioxidative, and light-colored tea sunscreen formulations with broadband UV protection
Source: Royal Society of Chemistry journal article supplement (doi:10.1039/d2gc04333e), 2023-01-01
Supplement: d2gc04333e1.pdf [file d2gc04333e1.pdf]

## Supplementary Information

### **Polyphenolic Condensation Assembly Enabled Biocompatible, Antioxidative, Light Color Tea Sunscreen Formulations with Broadband UV Protection**

*Qiulan Tong, †<sup>a,b</sup> Yue Xiao, †<sup>c,d</sup> Zeng Yi, †<sup>a,b</sup> Xiangyu Chen<sup>a,b</sup> Xian Jiang<sup>\*c,d</sup> and Xudong Li<sup>\*a,b</sup>*

*<sup>a</sup> National Engineering Research Center for Biomaterials, Sichuan University, Chengdu 610064, P. R. China.*

*<sup>b</sup> College of Biomedical Engineering, Sichuan University, Chengdu 610064, P. R. China.*

*<sup>c</sup> Department of Dermatology, West China Hospital, Sichuan University, Chengdu 610041, P. R. China.*

*<sup>d</sup> Laboratory of Dermatology, Clinical Institute of Inflammation and Immunology, Frontiers Science Center for Disease-related Molecular network, West China Hospital, Sichuan University, Chengdu 610041, P. R. China.*

Corresponding Author

\* Xian Jiang, Email address: [jennyxianj@163.com](mailto:jennyxianj@163.com)

\* Xudong Li, Email address: [xli20004@scu.edu.cn](mailto:xli20004@scu.edu.cn)

## **Contents of the Table and the Figures**

Table S1. Abbreviations and compositions of different polyphenol particles.

Table S2. Abbreviations and compositions of different emulsion formulations.

Table S3. Abbreviations and compositions of different optimized emulsion formulations.

Table S4. Element analysis of typical polyphenol nanoparticles.

Table S5. Mass spectrum analysis of EG21 NPs.

Figure S1. Digital photos of the reaction solution without (left) or with (right) amino acids.

Figure S2. Proposed reaction and structures for the condensation products of EGCG and amino acids.

Figure S3. (A) Fourier transform infrared spectroscopy (FTIR) and (B) corresponding magnified images of different TP particles.

Figure S4. (A) Digital photos for wettability and (B) the water contact angle value of different TP particles.

Figure S5. Free radical scavenging activity of EG21 NPs.

Figure S6. Appearance of polyphenol particles-stabilized emulsion formulations evenly spread on the skin.

Figure S7. Fluorescence microscope images of the droplets of emulsion formulations stabilized with 2:1 TP particles.

Table S1. Abbreviations and compositions of different polyphenol particles.

| Sample names | Polyphenol | Aldehyde                      | Amino acid  | Solvent         |
|--------------|------------|-------------------------------|-------------|-----------------|
| TPA          | TPA51      |                               | Arg, 100 mg |                 |
|              | TPA21      |                               | Arg, 250 mg |                 |
|              | TPA11      |                               | Arg, 500 mg |                 |
| TPC          | TPC51      | Tea polyphenol (TP)<br>500 mg | Cys, 100 mg |                 |
|              | TPC21      |                               | Cys, 250 mg |                 |
|              | TPC11      |                               | Cys, 500 mg |                 |
| TPG          | TPG51      |                               | Gly, 100 mg |                 |
|              | TPG21      |                               | Gly, 250 mg |                 |
|              | TPG11      | Formaldehyde (37%)            | Gly, 500 mg | Deionized water |
| EA           | EA51       | 100 $\mu$ L                   | Arg, 100 mg | 100 mL          |
|              | EA21       |                               | Arg, 250 mg |                 |
|              | EA11       |                               | Arg, 500 mg |                 |
| EC           | EC51       | EGCG (>94%)<br>500 mg         | Cys, 100 mg |                 |
|              | EC21       |                               | Cys, 250 mg |                 |
|              | EC11       |                               | Cys, 500 mg |                 |
| EG           | EG51       |                               | Gly, 100 mg |                 |
|              | EG21       |                               | Gly, 250 mg |                 |
|              | EG11       |                               | Gly, 500 mg |                 |

Table S2. Abbreviations and compositions of different emulsion formulations.

| Sample names | Stabilizers            | Oil phase          |
|--------------|------------------------|--------------------|
| TPA PE       | TPA 21, 20 mg/mL, 1 mL |                    |
| TPC PE       | TPC 21, 20 mg/mL, 1 mL |                    |
| TPG PE       | TPG 21, 20 mg/mL, 1 mL | Flaxseed oil, 1 mL |
| EA PE        | EA 21, 20 mg/mL, 1 mL  |                    |
| EC PE        | EC 21, 20 mg/mL, 1 mL  |                    |
| EG PE        | EG 21, 20 mg/mL, 1 mL  |                    |

Table S3. Abbreviations and compositions of different optimized emulsion formulations.

| Sample names | Stabilizers           | Oil phase         | PEG                  |
|--------------|-----------------------|-------------------|----------------------|
| 0.5% PE      | EG 21, 10 mg/mL,1 mL  |                   |                      |
| 1% PE        | EG 21, 20 mg/mL,1 mL  | Flaxseed oil,1 mL | 10 mg/mL, 10 $\mu$ L |
| 2.5% PE      | EG 21, 50 mg/mL,1 mL  |                   |                      |
| 5% PE        | EG 21, 100 mg/mL,1 mL |                   |                      |

Table S4. Element analysis of typical polyphenol nanoparticles.

| Sample name | Elemental analysis |       |       |       | Mass fraction of amino acid |                     |
|-------------|--------------------|-------|-------|-------|-----------------------------|---------------------|
|             | N (%)              | S (%) | C (%) | H (%) | Theoretical value (%)       | Detection value (%) |
| EG 21       | 2.83               | 0.01  | 51.44 | 5.27  | 13.77                       | 15.16               |
| EC21        | 1.69               | 2.80  | 53.51 | 5.19  | 11.58                       | 14.61               |

Table S5. Mass spectrum analysis of EG21 NPs.

| Main products | Mass spectrum analysis |           |
|---------------|------------------------|-----------|
|               | Peak area (S)          | Ratio (%) |
| I and II      | 25                     | 7.9       |
| III           | 79                     | 25.0      |
| IV            | 19                     | 6.1       |
| V             | 5                      | 1.5       |

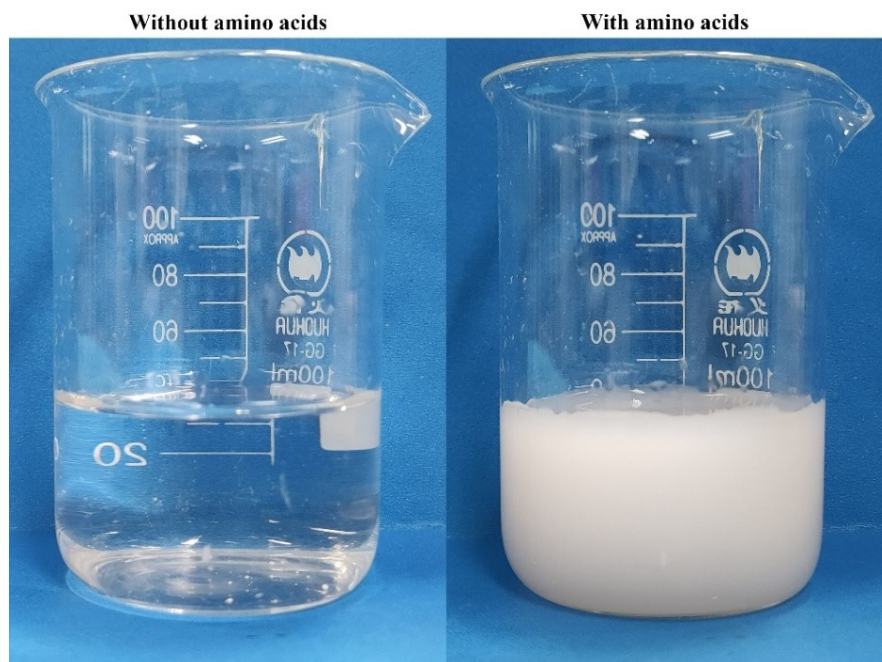

Figure S1. Digital photos of the reaction solution without (left) or with (right) amino acids.

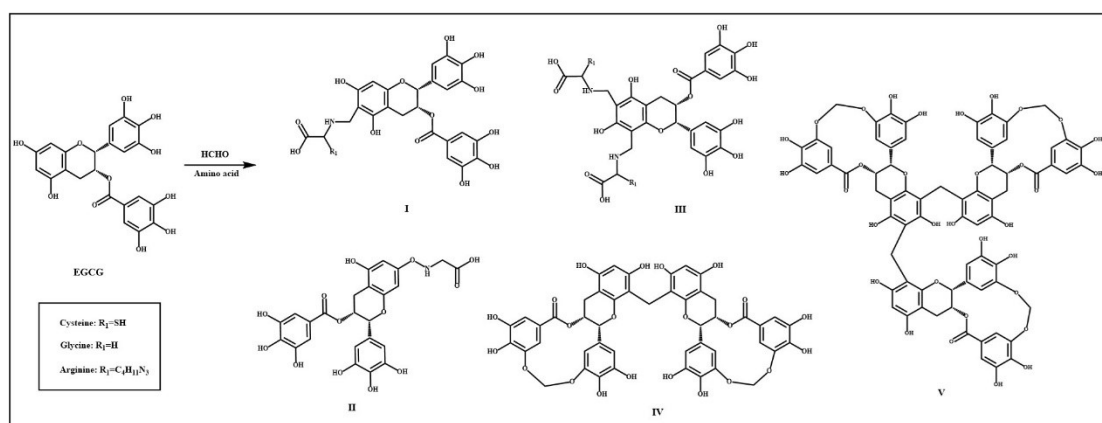

Figure S2. Proposed reaction and structures for the condensation products of EGCG and amino acids.

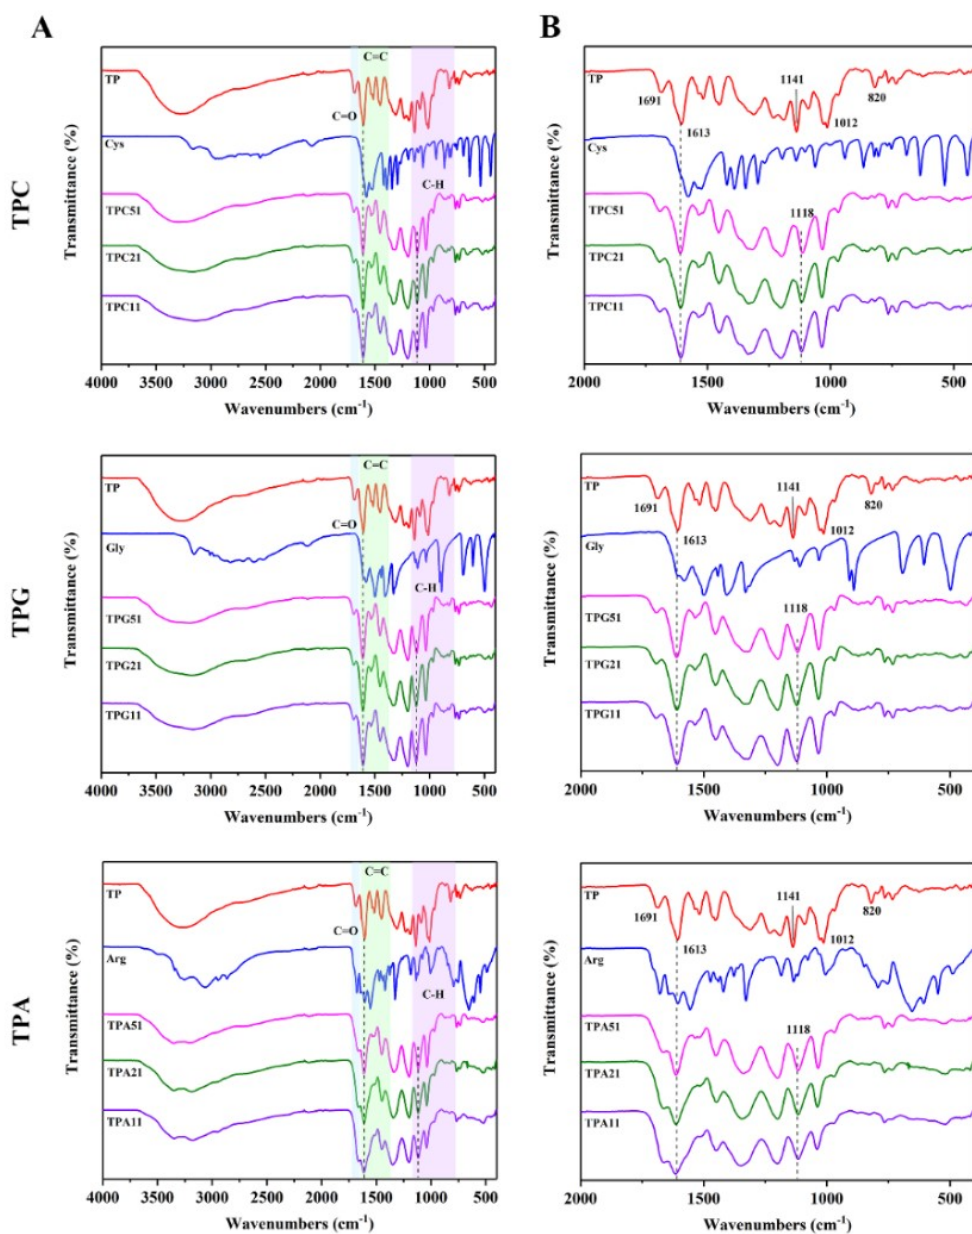

Figure S3. (A) Fourier transform infrared spectroscopy (FTIR) and (B) corresponding magnified images of different TP particles.

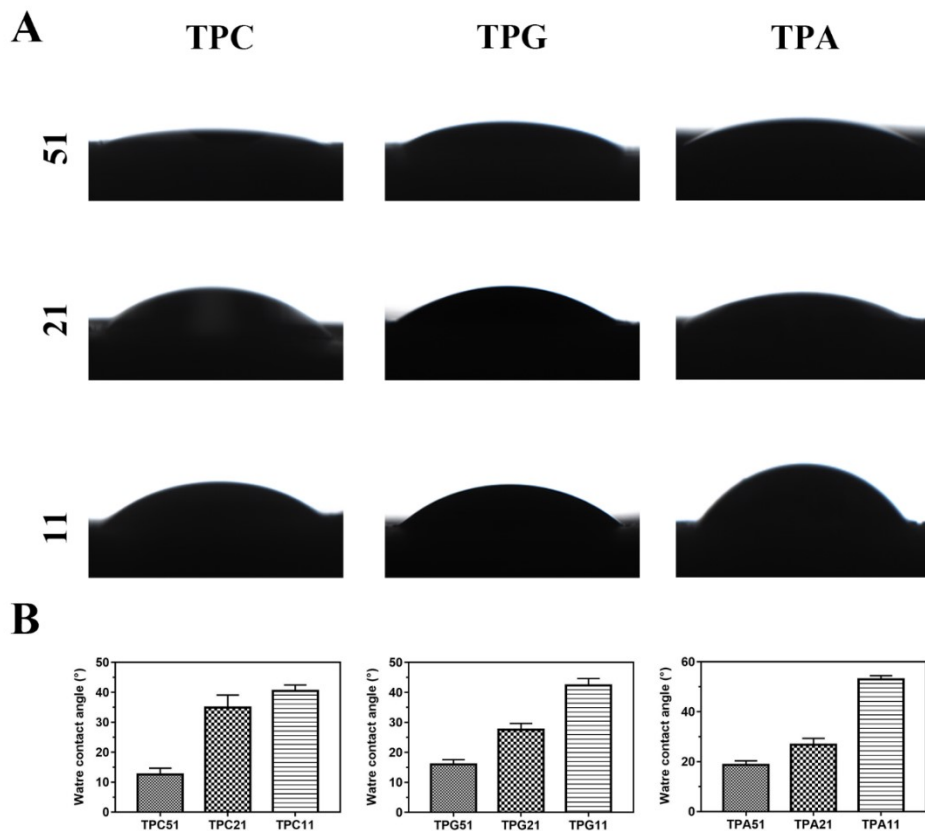

Figure S4. (A) Digital photos for wettability and (B) the water contact angle value of different TP particles.

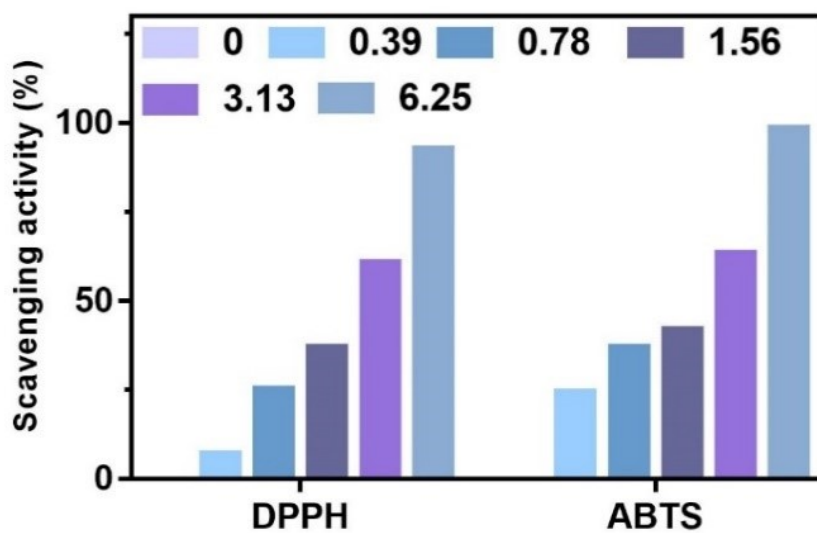

Figure S5. Free radical scavenging activity of EG21 NPs.

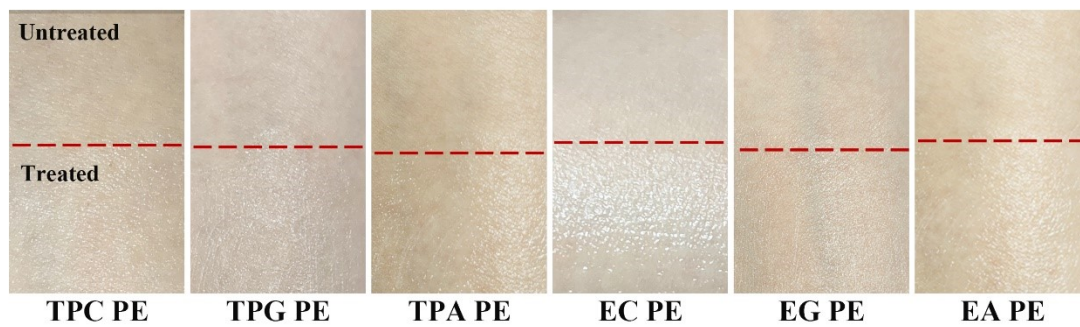

Figure S6. Appearance of polyphenol particles-stabilized emulsion formulations evenly spread on the skin.

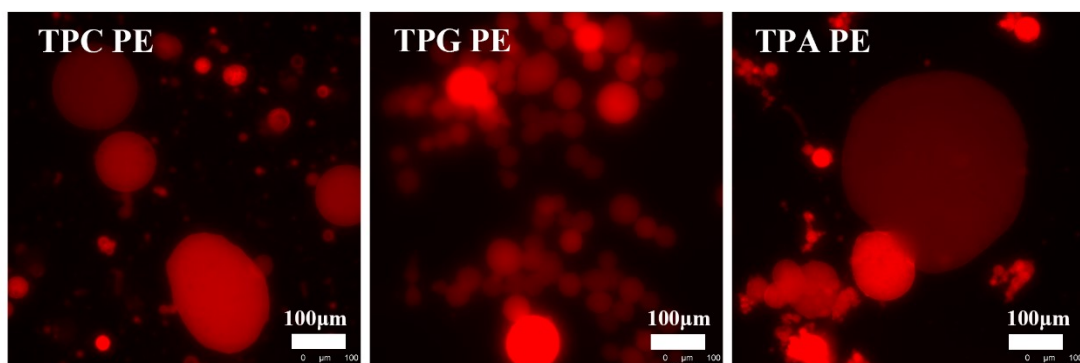

Figure S7. Fluorescence microscope images of the droplets of emulsion formulations stabilized with 2:1 TP particles.
